## CORRESPONDENCE

teaching purposes. In the third case, an improperly sterilized laryngeal mask airway (cleaned in Cidex) caused perilaryngeal edema, necessitating emergent conventional laryngoscopic intubation. The patient suffered no long-term morbidity, and the improper LMA cleaning procedure was identified and rectified immediately.

It is possible that new complications with new equipment may occur in the future, but this possibility applies to all clinical situations. We believe we use accepted methods very carefully, so that the risk of these methods does not require special consent.

**Jonathan L. Benumof, M.D.**  
Professor of Anesthesia

**Sheila D. Cooper, M.D.**  
Assistant Clinical Professor of Anesthesia

Anesthesiology  
1996; 85:439  
© 1996 American Society of Anesthesiologists, Inc.  
Lippincott-Raven Publishers

UCSD Medical Center  
Department of Anesthesiology  
402 Dickinson Street  
Mail Code 8812  
San Diego, California 92103-8812

## References

1. Cooper SD, Benumof JL: Teaching management of the airway: The UCSD Airway Rotation, Airway Management: Principles and Practice. Edited by Benumof JL. St. Louis, C.V. Mosby, 1996, pp 903-10
2. Rogers SN, Benumof JL: New and easy techniques for fiberoptic endoscopy-aided tracheal intubation. *ANESTHESIOLOGY* 1983; 59:569-72

(Accepted for publication May 2, 1996.)

## Tracheal Intubation through the Laryngeal Mask Airway

*To the Editor:*—The use of a 5-mm Mallinckrodt Microlaryngeal tube has been recommended for tracheal intubation through the laryngeal mask.<sup>1</sup> I consider that, for this purpose, the 6-mm Mallinckrodt reinforced tracheal tube (Mallinckrodt, Athlone, Ireland) is a better choice than the 5-mm microlaryngeal tube.

The length of the 6-mm reinforced tracheal tube is 33 cm. When the tracheal tube is inserted as far as possible into the laryngeal mask, the distance between the proximal edge of the tracheal tube cuff and the grill of the mask is 8 cm. Therefore, the cuff of the tracheal tube is unlikely to lie between the vocal cords when the tracheal tube is passed through the laryngeal mask, because the mean distance between the grille of the mask and the glottis is 3.6 cm in males and 3.1 cm in females.<sup>2</sup>

When a size 5 laryngeal mask is used, a 7-mm internal diameter reinforced tube can be passed through it. The tracheal tube protrudes beyond the grill of the mask for 10 cm, and the distance between the grille and the tracheal tube cuff is 4.5 cm.

The reinforced tube has a greater flexibility than the microlaryngeal tube, and therefore the reinforced tube may be more useful when the glottis is not positioned directly below the aperture of the laryngeal mask. In addition, because these reinforced tubes are larger than the microlaryngeal tube, there may be less concern for the airway resistance of the tube. Therefore, I believe that the 6-mm Mallinckrodt reinforced tracheal tube is more suitable for the technique of tracheal intubation through the laryngeal mask.

There is a factor that we should bear in mind when a longer tracheal tube is passed through the laryngeal mask. When a longer tracheal tube is passed through either a size 3 or 4 laryngeal mask, the tracheal tube may be inserted too deeply into the trachea; therefore, there is a theoretical risk of endobronchial intubation. The position of the tracheal tube should be assessed and the tube fixed to the laryngeal mask at an adequate depth.

**Takashi Asai, M.D.**  
Department of Anesthesiology  
Kansai Medical University  
Moriguchi City, Osaka  
Japan

## References

1. Pennant JH, Joshi GP: Intubation through the laryngeal mask airway. *ANESTHESIOLOGY* 1995; 83:891-2
2. Asai T, Latta IP, Vaughan RS: The distance between the grille of the laryngeal mask airway and the vocal cords: Is conventional intubation through the laryngeal mask safe? *Anaesthesia* 1993; 48: 667-9

(Accepted for publication May 2, 1996.)
